# Supplementary material for: Patientenorientierte Planungskriterien für die Logistik in der Notfallrettung
Source: Springer Nature journal article supplement (doi:10.1007/s10049-023-01254-6), 2024-01-03
Supplement: MOESM1 [file 26588458]

## Workshopzusammensetzung und -verlauf

Im Folgenden werden Informationen zur Zusammensetzung und zum Ablauf der Workshops zur Erstellung der Kategorien, zur Definition der Nutzenfunktionen und dem Mapping von Einsatzstichworten und Diagnosen bereitgestellt.

### Qualifikationen der Workshopteilnehmer

Nachfolgend werden die zusammengefassten Qualifikationen der in Summe elf an den Workshops beteiligten Personen aufgezeigt:

- Medizinische und Notfallmedizinische Qualifikationen
  - Facharzt für Anästhesiologie (5)
  - Facharzt Innere Medizin (1)
  - Zusatzbezeichnung Notfallmedizin (5)
  - Zusatzbezeichnung Klinische Akut- und Notfallmedizin (1)
  - Zusatzbezeichnung Intensivmedizin (2)
  - Zusatzbezeichnung Schmerztherapie (1)
  - Zusatzbezeichnung Palliativmedizin (1)
  - Zusatzbezeichnung spezielle anästhesiologische Intensivmedizin (1)
  - Zusatzbezeichnung ärztliches Qualitätsmanagement (2)
  - Leitender Notarzt (4)
  - Notfallsanitäter (2)
  - Rettungsassistent (2)
  - Organisatorischer Leiter Rettungsdienst (3)
  - Disponent entsprechend Anlage 3 (2)
- Organisatorische Qualifikationen
  - Rettungsingenieur (1)
  - Master of disaster management and risk governance (1)
  - QMB/QMA (Fachkunde an DRK-Landesschule) (1)
  - Qualitätsmanagementbeauftragter (1)
  - Fachwirt im Sozialwesen (1)
  - M.A. Management von Gesundheits- und Sozialeinrichtungen (1)
  - LL.M. Medizinrecht (1)
  - Diplom-Betriebswirt (1)

- Wirtschaftsfachwirt (IHK) (1)
- Funktionen in rettungsdienstlich relevanten Institutionen
  - Mitarbeiter des Krisenstabes des LK Göppingen (Katastrophenschutz) (1)
  - Leitender Notarzt der MedicalTaskForce des Bundesamtes für Katastrophenschutz (BBK) (1)
  - Ärztlicher Leiter Rettungsdienst (1)
  - Ärztlicher Verantwortlicher Rettungsdienst (2)
  - Landesarzt Hilfsorganisation (1)
  - Mitglied des Diözesanvorstandes der Malteser (Rottenburg-Stuttgart) (1)
  - Standortleiter NEF (1)
  - Landesrettungsdienstleiter ASB (1)
  - Leiter Integrierte Leitstelle (1)
  - FFW Zugführer (1)
- Ausbildung
  - Ausbilder IHK (3)
  - CRM - Simulationsinstruktor (1)
  - ärztl. Leiter ASB-Berufsfachschule FAMS (1)
  - Praxisanleiter (2)
  - Lehrrettungsassistent (1)

## Mapping der Einsatzstichworte und Diagnosen

Ziel des Mappings war es nicht, eine endgültige, umgehend operationalisierbare Kategorisierung der Einsatzstichworte und Diagnosen vorzunehmen. Zweck der Mappings ist es, plausible Annahmen über die Größenordnungen der Einsatzvolumina je Kategorie treffen zu können. Auf Basis dieser Schätzungen soll im weiteren Projektverlauf mithilfe von Simulation untersucht werden, welche Auswirkungen eine logistische Planung hat, die nicht auf einer Hilfsfrist, sondern auf differenzierten Nutzenfunktionen basiert. Insbesondere das Mapping der Einsatzstichworte kann zudem als Diskussionsgrundlage für den Weg zu einer über die Leitstellen hinweg einheitlichen Kategorisierung im Erstgespräch genutzt werden. In Summe wurden 297 Kategorisierungsregeln für die Einsatzstichworte und 873 Kategorisierungsregeln für die Diagnosen erstellt. Nachfolgend wird auf das Vorgehen zum Mapping eingegangen und exemplarische Kategorisierungsregeln werden aufgezeigt.

### Einsatzstichworte

Die Leitstellen in Baden-Württemberg verwenden jeweils eigene Meldebilder. Für diese Meldebilder besteht eine Zuordnung zu den landesweit konsentierten Einsatzstichworten für die Verwendung zur externen Qualitätssicherung bei der Stelle zur trägerübergreifenden Qualitätssicherung im Rettungsdienst Baden-Württemberg. Diese landesweit konsentierten Einsatzstichworte wurden in einem mehrstufigen Verfahren den Kategorien zugeordnet (s. Abbildung 1). Für die Einsatzstichworte wurden in einem ersten Schritt sieben unabhängige Zuordnungsvorschläge durch die Workshopteilnehmer erarbeitet. Dabei wurden zehn Einsatzstichworte einstimmig kategorisiert. In einem weiteren Workshop wurden die 89 nicht eindeutig kategorisierten Einsatzstichworte beleuchtet. Für 47 Einsatzstichworte konnte eine eindeutige Kategorie festgelegt werden. Bei den restlichen 42 Einsatzstichworte wurden die disponierten Rettungsmittel betrachtet. Unterschieden wurde nach Einsatz mit Rettungswagen und Notarzt, Einsatz mit Rettungswagen und Sondersignal bei Anfahrt, aber ohne Notarzt sowie Einsatz mit Rettungswagen ohne Sondersignal bei Anfahrt, sowie ohne Notarzt.

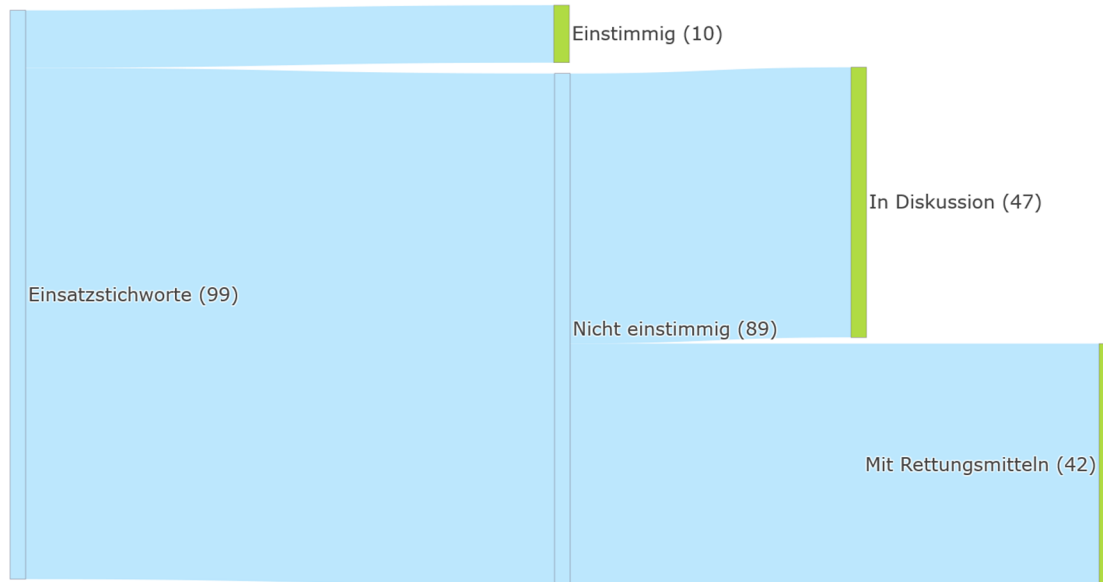

Abbildung 1: Entwicklung des Mappings der Einsatzstichworte zu den Kategorien

In Tabelle 1 finden sich exemplarische Regeln zur Kategorisierung von Einsatzstichworten. Ein Einsatzstichwort kann dabei eine große Bandbreite an Schweregraden abdecken. Die Kategorisierung basiert auf der Annahme, dass sich unterschiedliche Schweregrade in den disponierten Rettungsmitteln widerspiegeln.

Tabelle 1: Exemplarische Kategorisierungsregeln für Einsatzstichworte

| Einsatzstichwort                | NEF + RTW + SOSI | RTW + SOSI | RTW |
|---------------------------------|------------------|------------|-----|
| Trauma Gesicht/Hals/Kopf        | 1                | 2          | 3   |
| Bandscheibenbeschwerden/Lumbago | 1                | 2          | 3   |
| Hyperventilation                | 3                | 3          | 3   |
| Intoxikation sonstige           | 1                | 1          | 3   |

## Diagnosen

Bei der Dokumentation eines Notfalleinsatzes nach MIND4.0 werden durch das Einsatzpersonal eine oder mehrere Diagnosen aus einem definierten Katalog festgehalten. Die Diagnosen wurden durch die Workshopteilnehmer analog zu den Einsatzstichworten in mehreren Schritten den Kategorien zugeordnet (s. Abbildung 2). Für das Mapping der Diagnosen zu den Kategorien wurden in einem ersten Schritt parallel zwei unabhängige Vorschläge durch die Workshopteilnehmer erarbeitet. Dabei wurden 47 der 143 Diagnosen einstimmig kategorisiert. In einem weiteren Workshop wurden die nicht einstimmig kategorisierten Diagnosen diskutiert und weitere 50 Diagnosen konnten einer Kategorie zugeordnet werden. Die restlichen 46 Diagnosen konnten aufgrund der Breite der möglichen Schweregrade nicht eindeutig kategorisiert werden. Um diese Diagnosen kategorisieren zu können, wurden zusätzlich Vitalparameter betrachtet. Für die Grenzwerte der Vitalparameter wurde sich an den für den M-NACA Score festgelegten Grenzwerten orientiert.

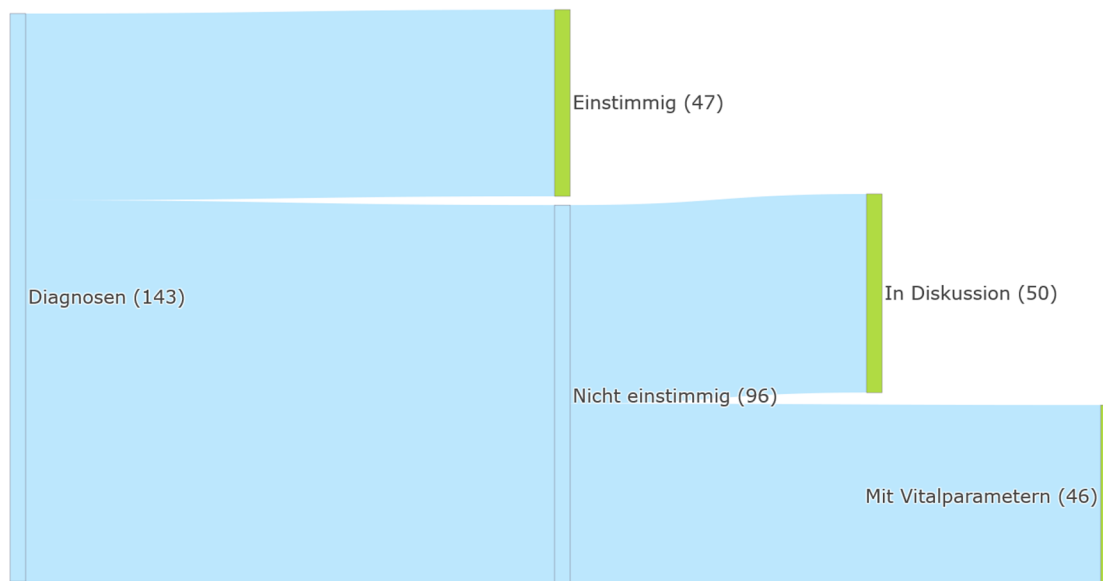

Abbildung 2: Entwicklung des Mappings der Diagnosen zu den Kategorien

In Summe resultieren aus dem Mapping 873 Kategorisierungsregeln. Jede Regel legt die Kategorie für eine Diagnose, ggfs. in Kombination mit einem oder mehreren Parametern fest. In Tabelle 2 sind exemplarische Kategorisierungsregeln dargestellt. Für einige Vitalparameter sind für den M-NACA Score nach Alter differenzierte Grenzwerte festgelegt. Für eine bessere Übersichtlichkeit werden diese in Tabelle 2 nicht vollständig aufgelistet, die betreffenden Stellen sind mit „Altersabstufung gemäß M-NACA“ gekennzeichnet.

Tabelle 2: Exemplarische Kategorisierungsregeln für Diagnosen

| Diagnose                            | Verknüpfung | Vitalparameter                    | Operator | Wert                         | Kategorie |
|-------------------------------------|-------------|-----------------------------------|----------|------------------------------|-----------|
| 1216 = Herz-Kreislauf-Stillstand    |             |                                   |          |                              | 1         |
| 1101 = TIA/Schlaganfall             |             |                                   |          |                              | 2         |
| 1203 = STEMI VW                     |             |                                   |          |                              | 2         |
| 1601 = Hypoglykämie                 |             | immer Kategorie 3 außer:          |          |                              | 3         |
|                                     |             | Bewusstsein1                      | gleich   | bewusstlos                   | 1         |
| 1804 = Hitzeerschöpfung, Hitzschlag |             | immer Kategorie 4 außer:          |          |                              | 4         |
|                                     |             | Bewusstsein1                      | gleich   | bewusstlos                   | 2         |
| 1305 = Pneumonie/Bronchitis         |             | immer Kategorie 5 außer:          |          |                              | 5         |
|                                     |             | Sauerstoffsättigung1              | gleich   | 0-87                         | 1         |
|                                     | oder        | Atemfrequenz1 UND Alter $\geq 18$ | grgl     | 30                           | 1         |
|                                     | oder        | Atemfrequenz1 UND Alter $< 18$    | grgl     | Altersabstufung gemäß M-NACA | 1         |
|                                     | oder        | Atemunterstützung/Beatmung        | gleich   | 3                            | 1         |
|                                     | oder        | Atemunterstützung/Beatmung        | gleich   | 4                            | 1         |
|                                     | oder        | Sauerstoffsättigung1              | gleich   | 88-90                        | 4         |
|                                     | oder        | Atemfrequenz1 UND Alter $\geq 18$ | gleich   | 26-29                        | 4         |
|                                     | oder        | Atemfrequenz1 UND Alter $< 18$    | gleich   | Altersabstufung gemäß M-NACA | 4         |
